# Supplementary material
Source: PubMed Central journal article supplement (PMC6698205)

# Supplemental Figure 1.

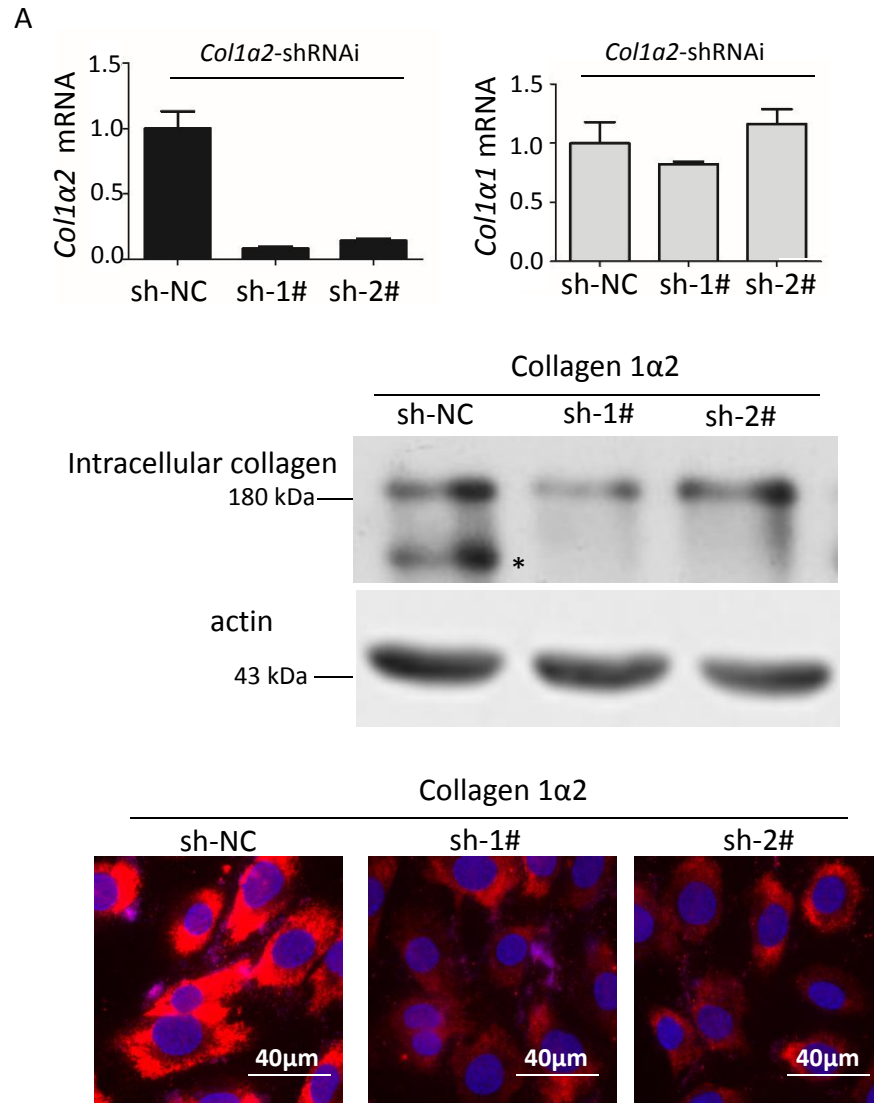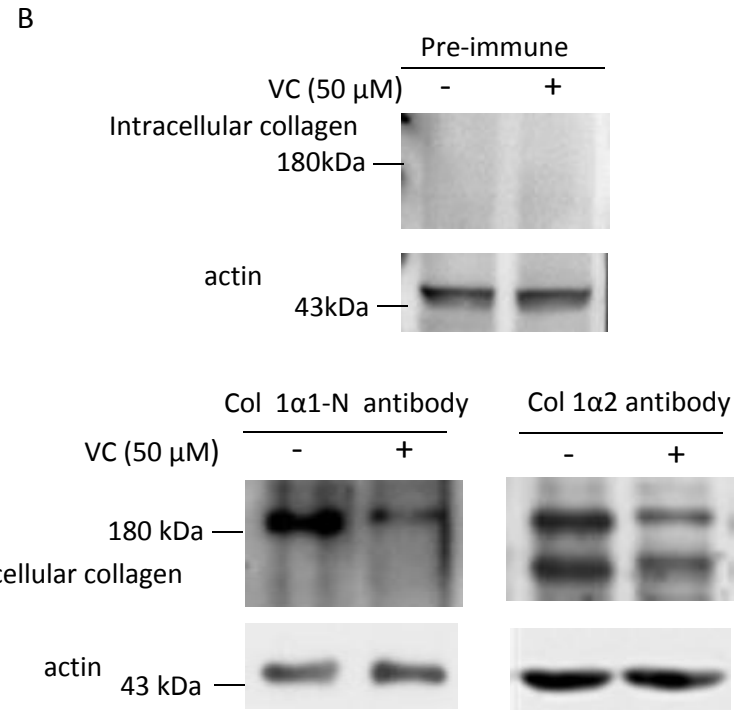

## Supplemental Figure 2

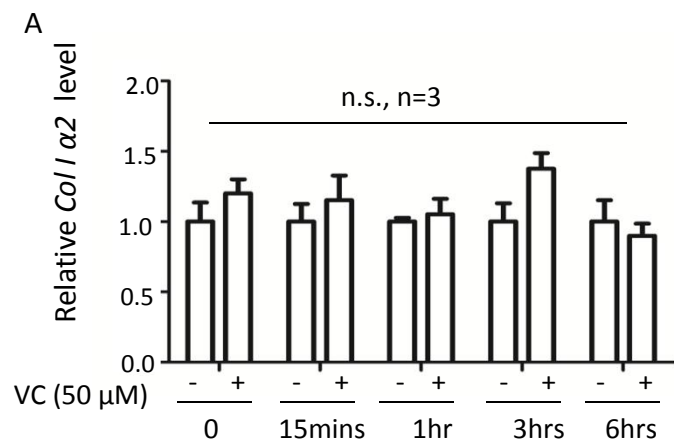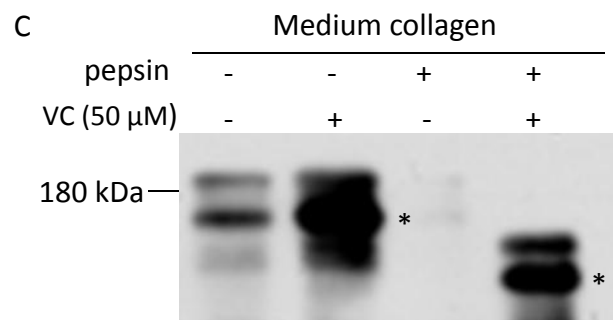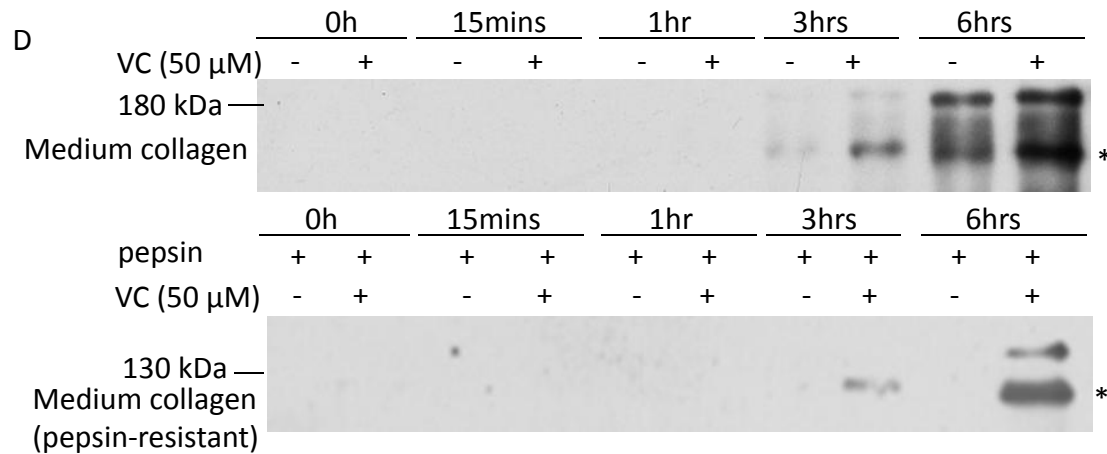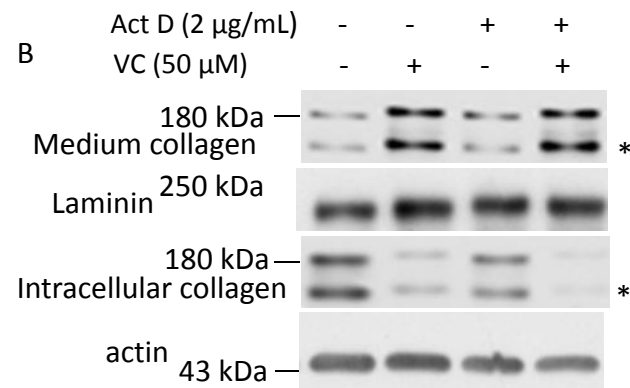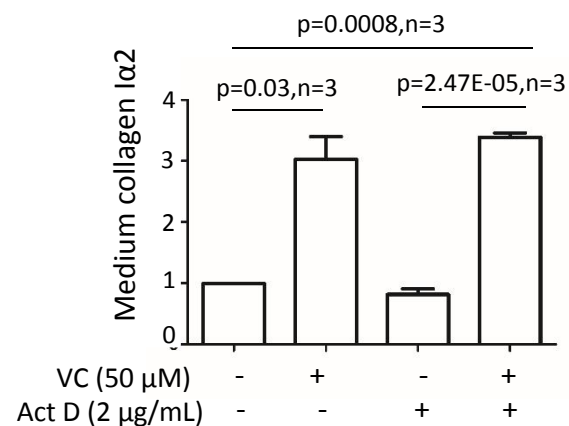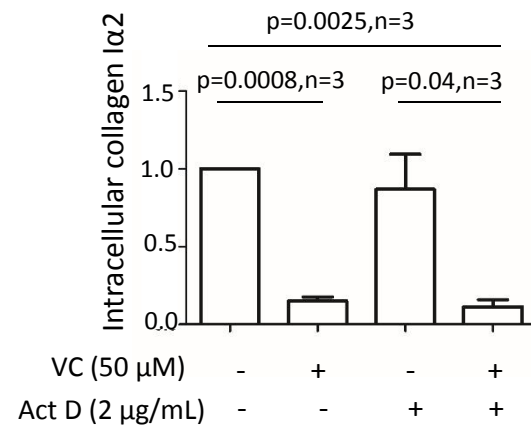

Supplemental Figure 3

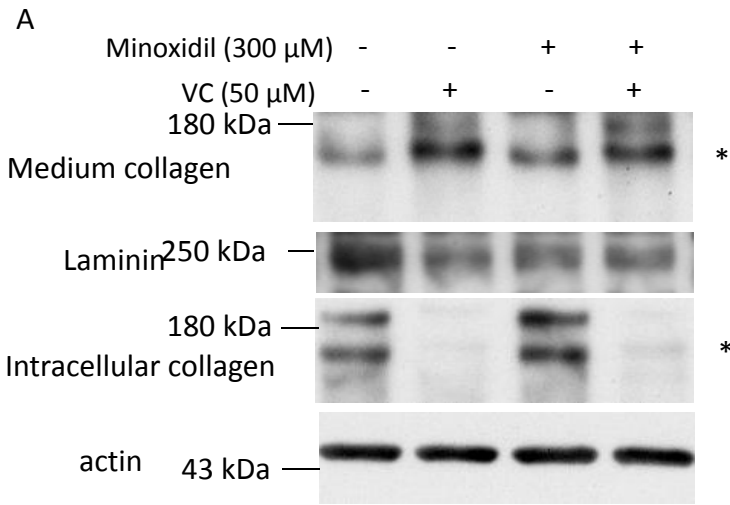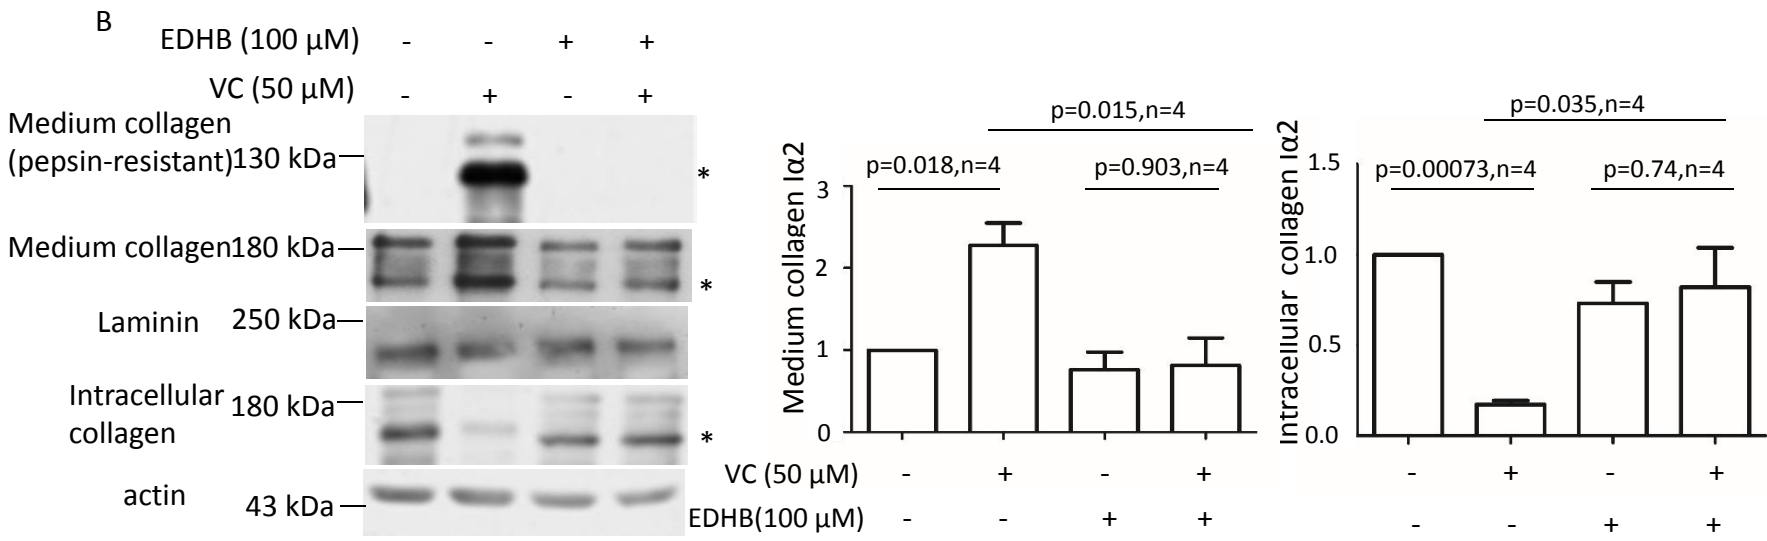

# Supplemental Figure 4

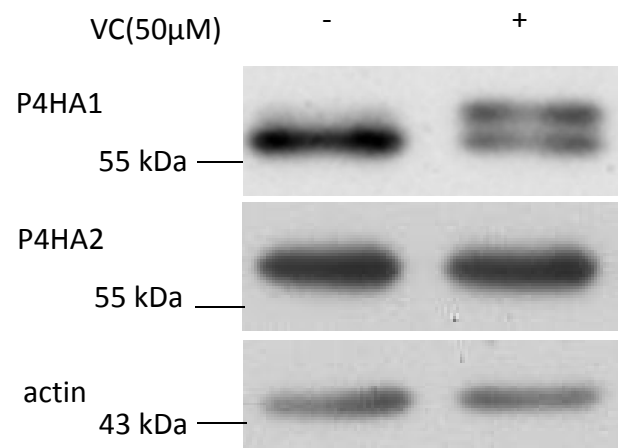

Supplemental Figure 5

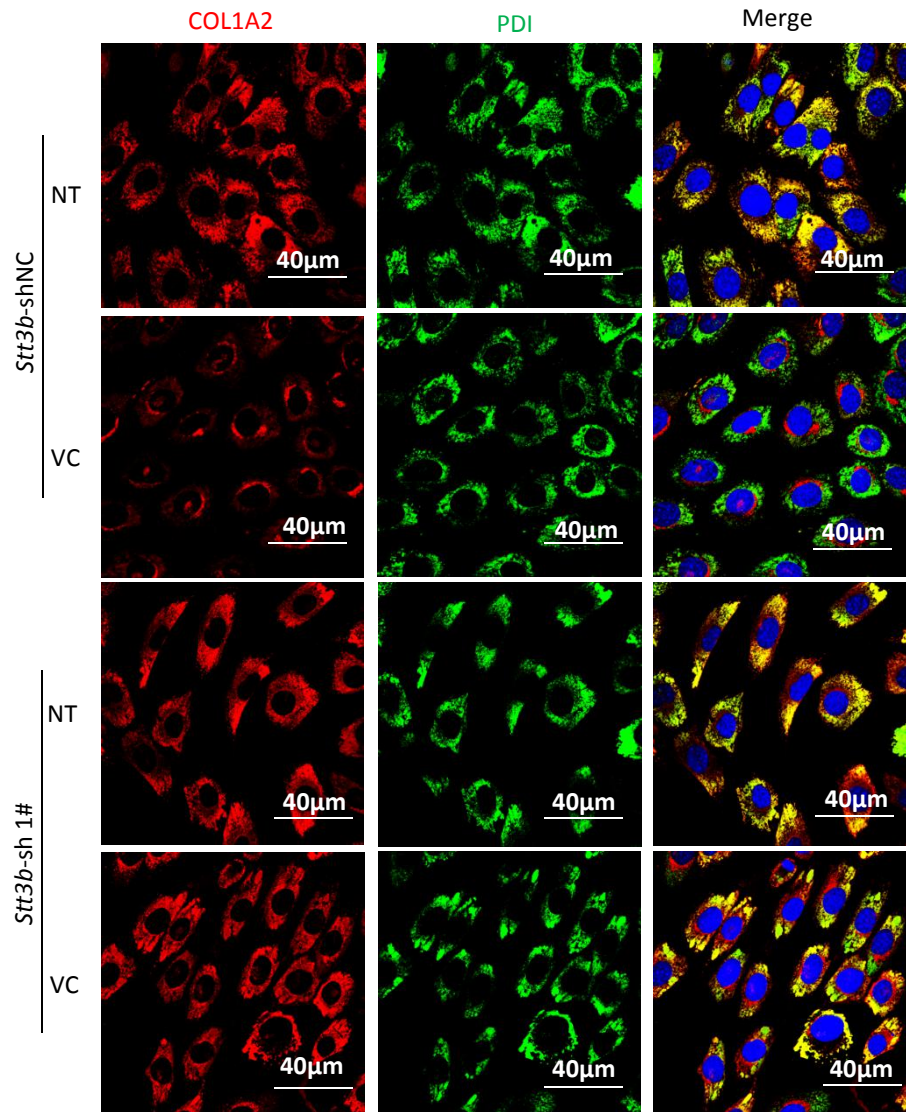

Supplemental Figure 6

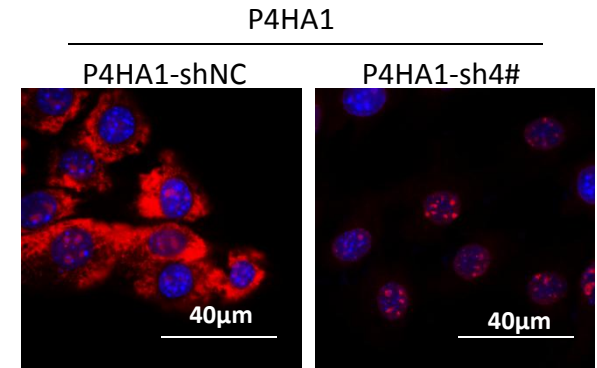

Supplemental Figure 7

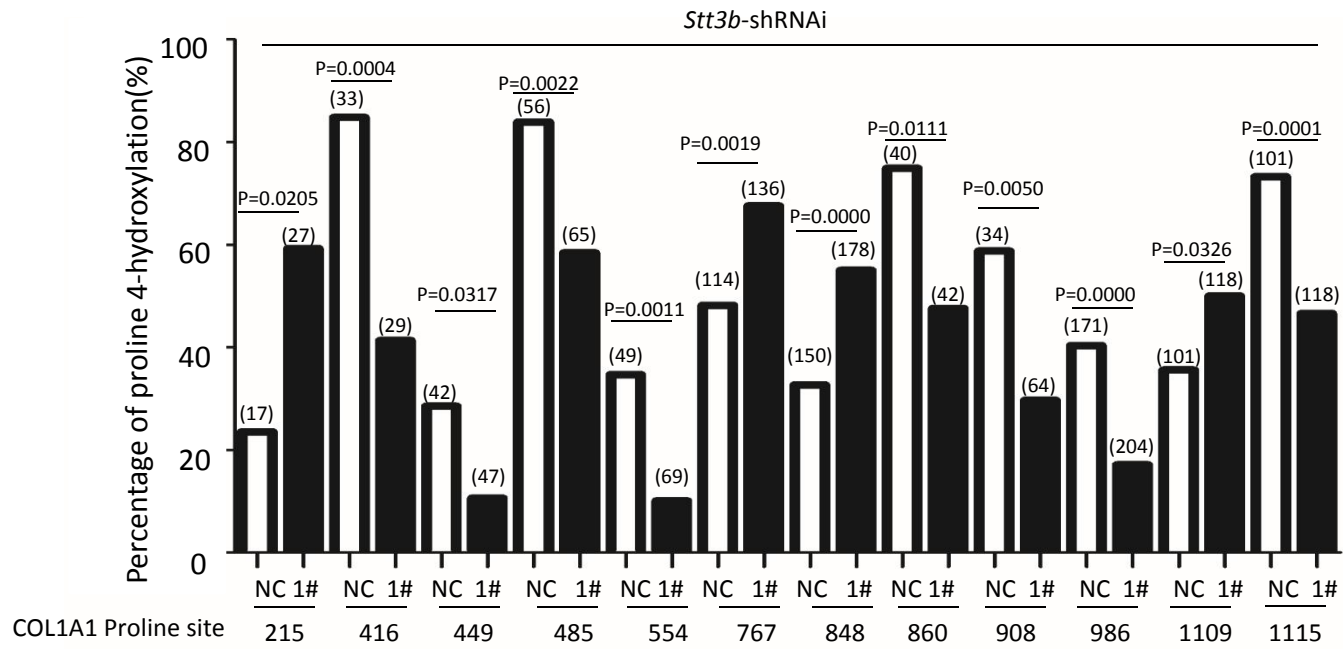

Supplement: NIHMS1525589-supplement-18_2019_3081_MOESM3_ESM.pdf [file NIHMS1525589-supplement-18_2019_3081_MOESM3_ESM.pdf]
